## Switching strategy in bumblebees

# 1 Bumblebees learn a relational rule but switch to a win-stay/lose-switch heuristic after 2 extensive training

3

4 HaDi MaBouDi<sup>1,2\*,†</sup>, Cwyn Solvi<sup>1,3†</sup>, Lars Chittka<sup>1</sup>

5

6 <sup>1</sup>School of Biological and Chemical Sciences, Queen Mary University of London, London E1 4NS,  
7 UK

8 <sup>2</sup>Department of Computer Science, University of Sheffield, Sheffield S1 4DP, UK

9 <sup>3</sup>Department of Biological Sciences, Macquarie University, North Ryde, NSW 2109, AU

10

11

12 †These authors contributed equally.

13 \*Corresponding author: HaDi MaBouDi, [h.maboudi@Sheffield.ac.uk](mailto:h.maboudi@Sheffield.ac.uk)

14

15 **Running Head:** Switching strategy in bumblebees

16

17

## 18 Abstract

19 Mapping animal performance in a behavioural task to underlying cognitive mechanisms  
20 and strategies is rarely straightforward, since a task may be solvable in more than one manner.  
21 Here, we show that bumblebees perform well on a concept-based visual discrimination task, but  
22 spontaneously switch from a concept-based solution to a simpler heuristic with extended training,  
23 all while continually increasing performance. Bumblebees were trained in an arena to find reward  
24 on displays with shapes of different sizes where they could not use low-level visual cues. One  
25 group of bees was rewarded at displays with bigger shapes and another group at displays with  
26 smaller shapes. Analysis of total choices shows bees increased their performance over 30 bouts  
27 to above chance. However, analyses of first and sequential choices suggest that after  
28 approximately 20 bouts, bumblebees changed to a win-stay/lose-switch strategy. Comparing  
29 bees' behaviour to a probabilistic model based on a win-stay/lose-switch strategy further supports  
30 the idea that bees changed strategies with extensive training. Analyses of unrewarded tests  
31 indicate bumblebees learned and retained the concept of relative size even after they had already  
32 switched to a win-stay, lost-shift strategy. We propose that the reason for this strategy switching  
33 may be due to cognitive flexibility and efficiency.

34

35 **Keywords:** abstract concepts, adaptive decision-making, animal cognition, behavioural analyses,  
36 cognitive flexibility, cognitive offloading, law of least effort

## Switching strategy in bumblebees

### 37 **1. Introduction**

38 Cognitive flexibility reflects an individual's ability to adaptively alter their behavioural  
39 strategy in accordance with a changing environment [1]. A fundamental challenge for animal  
40 cognition researchers is to decipher which strategies an animal uses in solving any particular task  
41 [2]. Indeed, there is often multiple ways for an animal to solve a behavioural task.

42  
43 Bees have been shown capable of learning various abstract relationships for example  
44 rules about target size (e.g. "pick the larger (or smaller) of two object sizes"), amongst myriad  
45 impressive cognitive abilities [3–5]. However, in some of these cases it may be that bees use a  
46 variety of different strategies to solve the tasks they are confronted with [5,6]. One recent study  
47 showed that some bees can solve a spatial concept learning task using a simple visual  
48 discrimination strategy through sequential scanning of stimuli rather than needing to compare  
49 stimuli based on an abstract rule, though other individuals may well follow such a rule [7]. In  
50 some numerical cognition tasks, honeybees may also use alternative cues that correlate with  
51 number, but are not in themselves numerical [8]. Bees' behavior in solving a delayed matching-  
52 to-sample task has been shown to be replicated by a model without any neural representations of  
53 the abstract concepts of sameness or difference [6]. Even the same individuals may have  
54 recourse to different solutions to the same task, depending on the extent of training. For example,  
55 with an increased number of training trials with a single pair of patterns, individual honeybees  
56 have been shown to have a greater generalized response to novel stimuli, i.e. the representation  
57 necessary to discriminate subsequent visual patterns changes with extended training [9]. All of  
58 these findings highlight the need for considering alternative strategies used by animals in  
59 cognitive tasks. This does not just concern the traditional dichotomy of "simple" versus "complex"  
60 solutions to such tasks. Different individuals may use different solutions that are equal in  
61 complexity, depending on their particular path to figuring out a solution.

62 Previous works have shown that honeybees are able to solve a task that appears to  
63 necessitate learning the concept of relative size and apply the rule to novel sizes within or outside  
64 the size range they were trained [10,11]. As with the examples above, bees may use more than  
65 one strategy to solve the same task, depending on the training protocol and context. Here, we  
66 test bumblebees to determine the strategies by which they cope with a relational rule learning  
67 task ("bigger-than"/"smaller-than") and examine their behaviour over time to reveal the cognitive  
68 strategies used over the course of training.

### 70 **2. Material and methods**

#### 71 **(a) Animals and experimental setup**

72 Bumblebees (*Bombus terrestris audax*) from commercially available colonies (Agralan  
73 Ltd, UK), were housed in a wooden nest-box connected to a flight arena (100 cm x 75 cm x 30

## Switching strategy in bumblebees

74 cm). Bees were allowed access to a flight arena through an acrylic corridor (25 cm x 3.5 cm x 3.5  
75 cm). Three plastic sliding doors located along the corridor allowed controlled access to the arena.  
76 The arena was covered with a UV-transparent clear acrylic sheet. The stimuli were presented to  
77 bees on the grey-coloured back wall of the arena.

78 Although there are no current requirements regarding insect care and use in research,  
79 experimental design and procedures were guided by the 3Rs principles [12]. The bumblebees  
80 were cared for on a daily basis by trained and competent staff, which included routine monitoring  
81 of welfare and provision of correct and adequate food during the experimental period. Colonies  
82 were provided with ~7 g irradiated commercial pollen (Koppert B.V., The Netherlands) every two  
83 days. Bees from three colonies were used in this study.

84

### 85 **(b) Pretraining phase**

86 All bumblebee workers were recruited from a gravity feeder containing 30% (w/w)  
87 sucrose solution placed in the centre of the arena. Outside of experiments, the colony was  
88 provided with 30% (w/w) sucrose solution from a small gravity feeder placed inside the nest-box  
89 during the evenings. Successful foragers on the arena gravity feeder were individually marked  
90 with number tags, superglued to their thorax, for identification during the subsequent experiment  
91 (Opalithplättchen, Warnholz & Bienenvoigt, Ellerau, Germany). Marked bees were pre-trained to  
92 find 50% (w/w) sucrose solution from microcentrifuge tubes (5mm diameter) at the centre of each  
93 of six white discs (7 cm diameter) on the grey-coloured back wall of the arena, horizontally 14 cm  
94 from each other vertically 9.3 cm from each other (positioned as in figure 1). These discs were  
95 made of paper and covered with transparent laminate to enable cleaning with 70% ethanol in  
96 water (v/v). All stimuli were printed with a high-resolution printer.

97

### 98 **(c) Training phase**

99 When several number-tagged bees had learnt to find reward from the tubes located in the centre  
100 of the display discs, one bee was randomly selected for the training phase. During the training  
101 phase, an individual bee was trained on six discs on the back wall of the arena with the same  
102 spacing as in training, each displaying one of two different sized shapes (figure 1a and c). During  
103 30 training bouts (a bout was a bee's visit to the arena and landings on different stimuli until  
104 satiated and subsequent return to her nest) one group of bees (n = 10) learned that the bigger of  
105 the two shapes contained 30 µl 50% sucrose solution and the smaller contained 30µl saturated  
106 quinine hemisulfate solution (bigger-than rule). Another group of bees (n = 8) learned the reverse  
107 contingency (smaller-than rule).

108 Between training bouts, each disc was rotated randomly so that the position of a shape  
109 varied across the six discs in relation to the central microcentrifuge tube containing sucrose  
110 solution (figure 1c). The location, shape and colour of stimuli sets were changed between bouts.

## Switching strategy in bumblebees

111 The shapes used in training varied in size (small, medium, large), type (circle, rectangle, cross)  
112 and colour (black, green, purple) (figure 1a). Only one type and colour of stimuli was presented to  
113 a bee in each bout and only two of the three sizes were presented during one bout. The  
114 dimensions of the shapes were as follows: small circle:  $\varnothing = 1.07$  cm; medium circle:  $\varnothing = 1.97$  cm;  
115 large circle:  $\varnothing = 2.87$  cm; small rectangle: 0.93 cm x 1.18 cm; medium rectangle: 1.79 cm x 2.92  
116 cm; large rectangle: 2.3 cm x 3.94 cm; small cross: width of bars = 0.46 cm, length of bars = 1.3  
117 cm; medium cross: width of bars = 0.6 cm, length of bars = 2.15 cm; large cross: width of bars =  
118 0.96 cm, length of bars = 2.87 cm. Note that there was a large variability between physical  
119 features of stimuli (figure S1). This variability ensured the bees were not able to solve the task by  
120 associating an absolute size of stimuli with certain reinforcements. Several of stimuli were paired  
121 with both positive and negative reinforcements during the training phase. For instance, middle  
122 size stimuli were paired with the positive reinforcement in some training bouts while these were  
123 paired with negative reinforcement in the rest of the training bouts. Further, the total area of the  
124 middle rectangular was bigger than the total area of the big cross (see figure S1a). All of these  
125 variations described ensured that low-level visual cues could not be used to solve the task.  
126 Stimuli were cleaned between each training bout with 70% ethanol in water (v/v) to ensure odour  
127 cues were not used to solve the task. After the daily experiment, all used microcentrifuge tubes  
128 were washed with soap-water, then cleaned with 70% ethanol solution. Finally, they were rinsed  
129 with water and air-dried in the temperature of the lab during the night.

130

### 131 **(d) Testing phase**

132 Following the training phase, each bee was tested in the same setup as in training in three  
133 different scenarios, but with stimuli in the tests providing 30  $\mu$ l of sterilized water (figure 1b and c).  
134 Tests lasted 120 seconds, at which point the bee was gently removed from the arena by using a  
135 cup and placed into the corridor until stimuli were changed for the refreshment bouts. Each test  
136 was separated by two refreshment training bouts between tests to maintain the bee's motivation.

137

138 The sequence of the three tests were counterbalanced across bees. The learning test evaluated  
139 performance by testing bees on one of the same sets of stimuli used during training, pseudo-  
140 randomly chosen (i.e. a random number generator was used to generate a random sequence of  
141 tests for each individual bee). The learning test used only the small- and bigger-sized training  
142 shapes. The other two tests used either a novel shape and size (star) or a novel colour (yellow),  
143 with the other properties pseudo-randomly chosen. The dimensions of the 5-pointed stars were as  
144 follows: small star: length of side of point = 0.5 cm; large star: length of side of point = 1.23 cm  
145 (See figure S1). As in training, stimuli were cleaned between each bout during the testing phase  
146 with 70% ethanol in water (v/v) to ensure odour cues were not used. Trained bees were removed  
147 from the nest once the training and tests phases were finished.

## Switching strategy in bumblebees

148

### 149 **(e) Statistical analysis and probabilistic model of learning curve**

150 To evaluate bees' performance over bouts, the percentage of correct choices (choices  
151 were defined as when a bee touched a microcentrifuge tube with her antennae or when she  
152 landed on a microcentrifuge tube) was calculated from either all choices or from only the first or  
153 second choices within each block of six bouts during training (total of five blocks). Using a  
154 generalised linear mixed model (GLMM) for binary probability (correct or incorrect), the effect of  
155 different factors such as colony, group of training and interaction between trial block and group of  
156 bees in the bees' performance were calculated. The bee index was included in the model as  
157 random factors. GLMMs were performed in MATLAB (MathWorks, Natick, MA, USA).

158 To determine whether bees used relative size information, rather than any other visual  
159 cues, the choices of bees during the unrewarded tests were evaluated by a Wilcoxon signed rank  
160 test. Further, a Kruskal-Wallis test was used to statistically evaluate and compare whether the  
161 bees' performance or choice numbers in different blocks of bouts are from the same distribution.

162 To test if bees might use a win-stay/lose-switch strategy during training, we calculated the  
163 conditional probabilities of each bee's second choice ( $c_2$ ) given their first choice ( $c_1$ ) at each block  
164 of 10 bouts. A conditional probability, "Probability of B, given A ( $P\{B|A\}$ )", is a probability of an  
165 event (B) occurring given that another event (A) has already occurred. The conditional probability  
166 of a lose-switch strategy, i.e. a correct second choice after an incorrect first choice, is calculated  
167 by  $P\{c_2 = 1|c_1 = 0\} = P\{c_2 = 1, c_1 = 0\}/P\{c_1 = 0\}$  where  $P\{c_2 = 1, c_1 = 0\}$  is the joint probability of  
168 a correct second choice and an incorrect first choice and  $P\{c_1 = 0\}$  is the probability of the first  
169 incorrect choice. The conditional probability  $P\{c_2 = 1|c_1 = 0\}$  at more than chance level indicates  
170 that a bee switched to another presented size when they found the first choice was incorrect. In  
171 the same way, we can calculate the conditional probability of a win-stay strategy, using  
172  $P\{c_2 = 1|c_1 = 1\} = P\{c_2 = 1, c_1 = 1\}/P\{c_1 = 1\}$ , i.e. the bee's second choice is the same size as  
173 the first choice when their first choice was correct.

174

### 175 *Model of prediction of learning curve based on a bee's first two choices*

176 We propose a Markov stochastic model [13] to describe the learning curve of bees'  
177 choices (total choices at each bout) based on the information of two first choices of bees. The  
178 performance of the model at each bout is assumed as

$$Perf = P\{c_1 = p\} \sum_{k=2}^N \prod_{i=2}^k P\{c_{i+1} = q|c_i = p\}$$

179  $P\{c_1\}$  is the probability of the first choice at each bout and  $P\{c_{i+1}|c_i\}$  is the conditional probability  
180 of  $(i + 1) - th$  choices given the of  $i - th$  choices ( $i \geq 1$ ) for when each choice in the sequential  
181 choices is correct or incorrect.  $p$  or  $q = 1$  if the choices are correct, otherwise  $p$  or  $q = 0$ . We

## Switching strategy in bumblebees

182 assume that the conditional probabilities of two sequential choices from the third choices are  
183 equal to the conditional probability of the second choice given the first choice expressed by bees  
184 at each bout of training. The sequence of possible events in which the probability of each event  
185 depends only on the state achieved in the previous event will be stopped (N) when the simulated  
186 bees collect all three positive reinforcements along with two, one or no incorrect choices within  
187 each bout according to the average number of choices at each bout.

188

### 189 **3. Results**

#### 190 **(a) Bees' overall performance increased over the 30 training bouts**

191 A multivariate statistical model, GLMM, applied to the performance of bees demonstrates  
192 a significant increase in the proportion of correct choices made over the 180 choices of the  
193 training phase (figure 2a,  $p = 0.018$ ) irrespective of the shape, colour or position of patterns within  
194 the stimuli. No significant differences were found between the learning curves of the two different  
195 contingency groups (*i.e.* "bigger-than" rule versus "smaller-than" rule;  $p = 0.87$ ). The output of the  
196 GLM confirms that there was no significant difference between the different colonies of bees  
197 during the training phase ( $p = 0.37$ ). These results show that bees became better at solving either  
198 contingency over training bouts.

199

#### 200 **(b) Bees used a win-stay/lose-switch strategy after extensive training**

201 The typical analysis used to determine whether an animal has solved a particular task is  
202 to calculate the animal's performance based on the number of correct and incorrect choices  
203 throughout the training phase. At first inspection, bees' behaviour during training suggests they  
204 learned to solve the concept-based task (figure 2a). However, a finer examination of their choices  
205 suggests the involvement of another strategy in the later stages of training. If bees had only used  
206 the concept of relative size throughout training, their first choices should reflect this by increasing  
207 in accuracy throughout the 30 bouts. Although bees' average overall accuracy gradually  
208 increased to 70% (significantly above chance level) over the 30 training bouts (figure 2b;  
209 Wilcoxon signed rank test:  $z = 3.72$ ,  $n = 18$ ,  $p = 1.96e-4$ ), their first-choice accuracy rose to 72%  
210 (significantly above chance level: Wilcoxon signed rank test:  $z = 3.55$ ,  $n = 18$ ,  $p = 3.71e-4$ ) over  
211 the first 20 bouts and then decreased to chance level (54%) over the next 10 bouts (Wilcoxon  
212 signed rank test:  $n = 18$ ,  $z = 1.25$ ,  $n = 18$ ,  $p = 0.21$ ; figure 2b) and decreased significantly across  
213 last two blocks of bouts (Wilcoxon signed rank test:  $z = 2.83$ ,  $n = 18$ ,  $p = 4.59e-3$ ). Second-choice  
214 accuracy was not different from chance level during the first two-thirds of the training phase  
215 (Wilcoxon signed rank test:  $z = -0.67$ ,  $n = 18$ ,  $p = 0.49$ ), but increased in the final third of the  
216 training phase to 73.33%, significantly above chance level (figure 2b; Wilcoxon signed rank test:  $z$   
217  $= 3.52$ ,  $n = 18$ ,  $p = 4.28e-4$ ). These results suggest that bees changed to a win-stay/lose-switch  
218 strategy after around 20 bouts of training, *i.e.* if they find reward at a stimulus they choose the

## Switching strategy in bumblebees

219 same type of stimulus next, or if no reward is found at a stimulus they choose a different type of  
220 stimulus next.

221 To help evaluate the possibility that bees switched strategies part way through training,  
222 we calculated the conditional probabilities (Materials and Methods) for 1) a correct second choice  
223 after a correct first choice (win-stay), and 2) a correct second choice after an incorrect first choice  
224 (lose-switch). Both of these two conditional probabilities increased over bouts (figure 2c; Kruskal-  
225 Wallis test,  $\chi^2 > 12.94$ ,  $df = 53$ ,  $p < 1.55e-3$ ), most notably rising to significantly above  
226 chance level in the last third of training (Wilcoxon signed rank test:  $z = 2.18$ ,  $n = 18$ ,  $p = 0.02$  for  
227 win-stay and  $z = 3.63$ ,  $n = 18$ ,  $p = 2.74e-4$  for lose-switch), again suggesting that bees had  
228 changed to a win-stay/lose-switch strategy.

229

### 230 **(c) Modelling a win-stay/lose-switch strategy**

231 To further examine whether bees switched strategies during training, we utilised a probabilistic  
232 model based on a win-stay/lose-switch strategy. Within our model, we used bees' overall and  
233 conditional performance (figures 2b and 2d) and initial first and second choices to predict bees'  
234 subsequent choices in each bout (Materials and Methods). Figure 2d shows that our model  
235 predicts the bees' performance in the last 10 bouts (i.e. no difference between the model's  
236 performance and bee's performance; Wilcoxon signed rank test:  $z = -1.41$ ,  $n = 18$ ,  $p = 0.15$ ). In  
237 contrast, our model's predicted performance was significantly poorer than the performance of  
238 bees in the first 20 bouts (Wilcoxon signed rank test:  $z > 2.32$ ,  $n = 18$ ,  $p < 0.01$  for both first two  
239 blocks). The ability of our model to predict the behaviour of our bees in the later stages of training  
240 but not the initial stages supports the hypothesis that bees changed to a win-stay/lose-switch  
241 strategy within the last 10 bouts of training.

242

### 243 **(d) Bees retained the concept of relative size after having switched strategies**

244 So far, our analyses and model results suggest that bees used a win-stay/lose-switch  
245 strategy only after extensive training. Bees seemed to have used a different strategy during the  
246 initial blocks of training bouts. Their increased performance to above chance level, suggests they  
247 were discriminating the stimuli based on size. To ensure that bees' initial strategy had actually  
248 been a relative size rule, we measured bees' performance directly after training in unrewarded  
249 tests. Because the tests were unrewarded, bees could not solve the task based on a win-  
250 stay/lose-switch strategy. Bees' performance on the learning test was above chance level  
251 (Wilcoxon signed rank test:  $z = 3.73$ ,  $n = 18$ ,  $p = 1.87e-4$ ), as was their performance on the novel  
252 shape transfer test (Wilcoxon signed rank test:  $z = 3.51$ ,  $n = 18$ ,  $p = 4.46e-4$ ), and on the novel  
253 colour transfer test ( $z = 3.03$ ,  $n = 18$ ,  $p = 2.41e-3$  for novel colour; figure 3a). Note that the  
254 variability in different shape sizes and resulting overlap between sizes across shapes prevented

## Switching strategy in bumblebees

255 bees from associating a general size with reward (figure S1). These results suggest that the bees  
256 had at some point during training learned to solve the task based on the concept of relative size.

257 Because animals vary in their learning and performance, we posited that if bees had  
258 learned and retained a relative size rule, how well they performed in training before changing  
259 strategies should reflect how well they perform (i.e. remember the relational rule) during the  
260 learning test. In line with this, there was a positive correlation between the average of first choice  
261 accuracy in the second third of the training phase (prior to strategy change) and bees'  
262 performance in the learning test (figure 3*b*; Spearman correlation:  $\rho = 0.58$ ,  $n = 18$ ,  $p = 0.01$ ).  
263 Although bees seemed to have changed strategies after extensive training, the results of the  
264 unrewarded tests show that bees had learnt the relative size rule during training, retained the rule  
265 even after having changed strategies late in training, and therefore resorted to the relative size  
266 rule strategy during the tests.

267 Note that the performance of bees in the learning test was significantly poorer than the  
268 last bout of the training phase (figure 3*c*; Wilcoxon signed rank test:  $z = 3.31$ ,  $n = 18$ ,  $p = 9.30e$ -  
269 4). This suggests that bees began the learning test using a win-stay/lose-switch strategy. This  
270 makes sense because they had just been using a win-stay/lost-switch strategy during training  
271 and had no knowledge that the test was unrewarded. Further, bees' performances on the second  
272 half of choices during each of the tests was better than their performance on the first half, (figure  
273 3*d*; Wilcoxon signed rank test:  $z = 1.82$ ,  $n = 18$ ,  $p = 0.03$  for Learning test;  $z = 0.57$ ,  $n = 18$ ,  $p =$   
274 0.28 for Novel shape;  $z = 1.05$ ,  $n = 18$ ,  $p = 0.14$  for Novel colour), indicating that bees had  
275 reverted to the retained relative size strategy.

276 Why would bees change strategies if they were already performing above chance level?  
277 We hypothesized that bees might change strategies if the new strategy was more efficient, i.e. it  
278 took them less effort to locate all three rewarding discs (discs were not refilled during training). In  
279 support of this, the number of total choices by bees decreased from an average of 7.1 choices  
280 per bout at the beginning of training to an average of 5.1 choices per bout at the end of training  
281 (figure 4; Kruskal-Wallis test,  $\chi^2 = 22.70$ ,  $df = 53$ ,  $p = 1.17e-5$ ), indicating that bees' efficiency  
282 increased during training across a change in strategy.

283

## 284 4. Discussion

285 We demonstrate and corroborate previous findings [11,14] that bees can learn a relative  
286 size rule, but after extensive training opted to use a simpler strategy. Because there can often be  
287 more than one way of processing the same stimuli to solve a cognitive task, it is useful to  
288 examine individual strategies and over extended periods to explore if multiple strategies might be  
289 at play. In our paradigm, we prevented bees from using low-level visual cues. Initial increases in  
290 performance suggested that bees learned the task and later performance on unrewarded tests  
291 verified that bees had learnt and retained a relational rule, as was previously demonstrated in



## Switching strategy in bumblebees

292 honeybees [11,14]. However, statistical analyses showed that after extensive training, bees  
293 began to use a win-stay/lose-switch strategy based on whether or not they were rewarded on  
294 each stimulus. Bees' performance calculated by their first choices or by multiple sequential  
295 choices revealed a strategy of decision making that had been hidden within the gross calculation  
296 by total choices. Averaging all choices in a training bout or test is common within bee cognition  
297 and within other animal research communities. We suggest that interpretations of any animal  
298 cognition study involving multiple choices include analyses of first and sequential choices to  
299 investigate potential alternative strategies.

300

301         Theoretical and empirical work maintain that animals tend to follow the “law of least effort”  
302 [15,16], whereby subjects choose strategies that minimise the costs in obtaining desirable  
303 outcomes [15,17]. In comparative cognition research, animals may use strategies different to  
304 those we intend a specific paradigm to test and still perform well on the behaviour we are  
305 measuring [2,7,8,18,19]. Most studies have focused on the idea that animals opt to minimize  
306 physical work, but this idea extends to cognitive effort as well [20–22]. The ability to change  
307 decision-making strategies with the changing demands of the environment is essential to  
308 adaptive behaviour, and therefore survival. Lloyd and Dayan [23] proposed that constant  
309 monitoring of information to promptly assess and predetermine decision-making strategies would  
310 be too costly for animals to maintain. Similarly, commitment for extended periods of time to one  
311 strategy without the ability to adjust could be deleterious [23]. These authors suggested, with  
312 support from computational models, that temporal commitment to certain strategies with  
313 intermittent interruption to assess costs and switch strategies would be more advantageous for  
314 real world scenarios. Bumblebees in our study seem to follow a similar overall approach, as they  
315 first learn an abstract concept (relative size) and stick with this rule for approximately 20 bouts, at  
316 which point they change to a new strategy (see figure S2 for the individual difference between  
317 bees). A decrease in the number of choices taken to find all rewarding stimuli (figure 4) indicate  
318 that bees may have changed strategies to become more efficient. Further studies are needed to  
319 check the role of efficiency in strategy selection in animals. Further studies should involve  
320 videotaping the behaviour of bees during the training and test phases, so that one can make  
321 some direct inferences about time invested, mechanisms of inspecting stimuli and the efficiency  
322 of decisions.

323

324         In this light, our results support the idea that animals can adaptively weigh the costs of  
325 cognitive effort across decision-making approaches and choose the less cognitively demanding  
326 strategy [24]. This interpretation requires that the win-stay/lose-switch strategy was actually  
327 simpler than the relative size rule. Indeed, the win-stay/lose-switch heuristic is cognitively less  
328 demanding than any relational rule, simply because it is based only on the outcome of the

## Switching strategy in bumblebees

329 previous choice, and therefore could be solved using working memory alone [25]. Accordingly,  
330 bees could have stored the visual template of the first stimulus in working memory and, if the first  
331 choice was correct, subsequently chosen a stimulus that had more overlap with the stored  
332 template, or if the first choice was incorrect, subsequently chosen a stimulus with less overlap  
333 (template hypothesis; [26]). The win-stay/lose-shift strategy has been broadly observed and  
334 explored in bees foraging strategies and flower constancy amongst variable rewarding species of  
335 flowers [27–31]. This type of sequential matching/non-matching to sample strategy has been  
336 shown to be solvable with a simple computational model based on the known neural circuitry of  
337 the bee brain, without requiring any higher-order abstract concept [6]. Learning and applying an  
338 abstract concept like relative size rule requires a substantial abstraction process to different  
339 stimuli that must work independent of the physical characteristics of stimuli [32]. In mammals, it is  
340 assumed that higher cognitive functions processed in the prefrontal cortex or analogous  
341 structures are essential for rule learning [33,34]. In insects, it has been proposed that rule  
342 learning occurs in the mushroom bodies, high-level sensory integration centres [35,36]. In  
343 contrast to rule-learning, bees can use a simple associative mechanism to remember the  
344 previously visited stimulus in order to make decisions about a subsequent stimulus. Therefore,  
345 the effort required in a win-stay/lose-switch type mechanism is likely to be lower than an abstract  
346 rule because bees can learn to recognize and associate a stimulus with reward without using  
347 their mushroom bodies [37,38]. For example, honeybees with inactivated mushroom bodies can  
348 perform some odour learning tasks as well as control bees [37,39]. Further, a realistic  
349 computational model of olfactory information processing in the bee brain shows that two parallel  
350 odour pathways with different functions provide the flexibility necessary for comparing multiple  
351 olfactory stimuli during associative and non-associative discrimination tasks [38].

352

353         Although our results indicate that bees switched to a win-stay/lose-switch heuristic, it is  
354 unclear why bees would learn the relative size concept first if the win-stay/lose-switch strategy is  
355 cognitively simpler. We speculate that this strategy may have been initially favoured simply to  
356 reduce the load on long-term memory and to speed up the decision-making process so as to  
357 avoid the quinine containing discs. During pretraining, bees only received reward from white  
358 disks. When training began, all of the discs suddenly contained coloured shapes and the bees  
359 found not only reward but also aversive quinine. Because of this abrupt and dramatic change,  
360 bees' priority may have been to learn to avoid the quinine containing discs. To accomplish this  
361 quickly, they could have extracted a set of elementary visual features to avoid in the first bout of  
362 training. During the next bouts, instead of switching to a new strategy relying on working memory,  
363 they stuck with identifying and avoiding the template for the quinine containing discs. Over the  
364 next trials, they learned to generalise and group visual features across stimuli in a manner  
365 consistent with the concept of relative size [32,40]. Because constant monitoring of how well they

## Switching strategy in bumblebees

366 were doing would be too costly [23], it took them some time to assess their performance and try  
367 out a new strategy. Of course, further analysis of bees' behaviour during the training and test  
368 phases are required to uncover the true mechanisms underlying bees' strategy selections.

369

370 As a result of bees learning a relative size rule early in training, we would have expected to  
371 see an improvement on second choice performance from the first 10 bouts to the second 10  
372 bouts in the training phase similar to the bees' improvement on first choices (figure 2*b*). However,  
373 bees' performance on second choices was not significantly different from chance level within 20  
374 bouts of training. We are unable to say from our data why this was the case, but speculate that  
375 motivation and attention may play a role – once bees found reward, they might have been less  
376 likely to fly back within the arena to view stimuli head on to properly view and assess stimuli, and  
377 rather flew directly to a nearby disc to check for food, which statistically would be more likely to  
378 be unrewarding (because of the remaining five discs only two would be rewarding). This type of  
379 motivational-based exploration may also account for why bees eventually changed to a win-  
380 stay/lose-switch strategy. Figure S2 shows a large variability between individuals in second  
381 choice performance, and therefore individual differences in motivation and attention may have  
382 played a part in why second choice performance was lower than expected [41,42]. However,  
383 many of the bees did show an improvement in their second choices from the first 10 bouts to the  
384 second ten bouts. Analyses of sequential choices in future studies of animal cognition will help  
385 resolve these questions.

386

387

### 388 **Authors' contributions**

389 H.M. and L.C. conceived the study. H.M. designed and performed the experiment. H.M. and C.S.  
390 analysed data. H.M., C.S. and L.C. wrote the paper.

391

### 392 **Competing interests**

393 The authors declare no completing financial interests.

394

### 395 **Funding**

396 This study was supported by HFSP program grant [RGP0022/2014], EPSRC program grant  
397 Brains on Board [EP/P006094/1], an ERC Advanced Grant [339347] and a Royal Society  
398 Wolfson Research Merit Award to Lars Chittka.

399

### 400 **Acknowledgments**

401 We thank Stephan Wolf and Mark Roper for helpful discussions.

402

## Switching strategy in bumblebees

### 403 **Conflict of interest statement**

404 All authors declare they have no conflicts of interest.

405

### 406 **Ethical statement**

407 There are currently no international, national or institutional guidelines for the care and use of  
408 bumblebees in research. However, experimental design and procedures were guided by the 3Rs  
409 principles. Bumblebees were cared for on a daily basis by trained and competent staff, which  
410 included routine monitoring of welfare and provision of correct and adequate food during the  
411 experimental period.

412

### 413 **Supplemental information**

414 Information includes two figures and one data file.

415

## Switching strategy in bumblebees

### 416 **References:**

- 417 1. Wasserman EA, Zentall TR. 2006 *Comparative cognition: Experimental explorations of*  
418 *animal intelligence*. Oxford University Press, USA.
- 419 2. Shettleworth SJ. 2001 Animal cognition and animal behaviour. *Anim. Behav.* **61**, 277–286.
- 420 3. Giurfa M, Zhang S, Jenett A, Menzel R, Srinivasan MV. 2001 The concepts of ‘sameness’ and  
421 ‘difference’ in an insect. *Nature* **410**, 930–933. (doi:10.1038/35073582)
- 422 4. Perry CJ, Barron AB. 2013 Honey bees selectively avoid difficult choices. *Proc. Natl. Acad.*  
423 *Sci.* **110**, 19155–19159. (doi:10.1073/pnas.1314571110)
- 424 5. Skorupski P, MaBouDi H, Dona HSG, Chittka L. 2018 Counting insects. *Phil Trans R Soc B*  
425 **373**, 20160513. (doi:10.1098/rstb.2016.0513)
- 426 6. Cope AJ, Vasilaki E, Minors D, Sabo C, Marshall JAR, Barron AB. 2018 Abstract concept  
427 learning in a simple neural network inspired by the insect brain. *PLOS Comput. Biol.* **14**,  
428 e1006435. (doi:10.1371/journal.pcbi.1006435)
- 429 7. Guiraud M, Roper M, Chittka L. 2018 High-speed videography reveals how honeybees can  
430 turn a spatial concept learning task into a simple discrimination task by stereotyped flight  
431 movements and sequential inspection of pattern elements. *Front. Psychol.* **9**, 1347.  
432 (doi:10.3389/fpsyg.2018.01347)
- 433 8. Vasas V, Chittka L. 2019 Insect-inspired sequential inspection strategy enables an artificial  
434 network of four neurons to estimate numerosity. *iScience* **11**, 85–92.  
435 (doi:10.1016/j.isci.2018.12.009)
- 436 9. Stach S, Giurfa M. 2005 The influence of training length on generalization of visual feature  
437 assemblies in honeybees. *Behav. Brain Res.* **161**, 8–17. (doi:10.1016/j.bbr.2005.02.008)
- 438 10. Avarguès-Weber A, d’Amaro D, Metzler M, Dyer AG. 2014 Conceptualization of relative size  
439 by honeybees. *Front. Behav. Neurosci.* **8**. (doi:10.3389/fnbeh.2014.00080)
- 440 11. Howard SR, Avarguès-Weber A, Garcia J, Dyer AG. 2017 Free-flying honeybees extrapolate  
441 relational size rules to sort successively visited artificial flowers in a realistic foraging  
442 situation. *Anim. Cogn.*, 1–12. (doi:10.1007/s10071-017-1086-6)
- 443 12. Russell WMS and B. 1959 *The principles of humane experimental technique*. London:  
444 Methuen.
- 445 13. Gagniuc PA. 2017 *Markov chains: from theory to implementation and experimentation*. John  
446 Wiley & Sons.
- 447 14. Avarguès-Weber A, d’Amaro D, Metzler M, Dyer AG. 2014 Conceptualization of relative size  
448 by honeybees. *Front. Behav. Neurosci.* **8**. (doi:10.3389/fnbeh.2014.00080)
- 449 15. Hull CL. 1943 *Principles of behavior: an introduction to behavior theory*. Oxford, England:  
450 Appleton-Century.

## Switching strategy in bumblebees

- 451 16. Froment AJ de, Rubenstein DI, Levin SA. 2014 An extra dimension to decision-making in  
452 animals: The three-way trade-off between speed, effort per-unit-time and accuracy. *PLOS*  
453 *Comput. Biol.* **10**, e1003937. (doi:10.1371/journal.pcbi.1003937)
- 454 17. Mobbs D, Trimmer PC, Blumstein DT, Dayan P. 2018 Foraging for foundations in decision  
455 neuroscience: insights from ethology. *Nat. Rev. Neurosci.* **19**, 419. (doi:10.1038/s41583-018-  
456 0010-7)
- 457 18. Pfungst O. 2010 *Clever Hans (The Horse of Mr. Von Osten) A contribution to experimental*  
458 *animal and human psychology*. See <http://www.gutenberg.org/ebooks/33936>.
- 459 19. Chittka Lars, Rossiter Stephen J., Skorupski Peter, Fernando Chrisantha. 2012 What is  
460 comparable in comparative cognition? *Philos. Trans. R. Soc. B Biol. Sci.* **367**, 2677–2685.  
461 (doi:10.1098/rstb.2012.0215)
- 462 20. Kool W, McGuire JT, Rosen ZB, Botvinick MM. 2010 Decision making and the avoidance of  
463 cognitive demand. *J. Exp. Psychol. Gen.* **139**, 665–682. (doi:10.1037/a0020198)
- 464 21. LeDoux J. 2012 Rethinking the emotional brain. *Neuron* **73**, 653–676.
- 465 22. Elnor RW, Hughes RN. 1978 Energy maximization in the diet of the shore crab, *Carcinus*  
466 *maenas*. *J. Anim. Ecol.* , 103–116.
- 467 23. Lloyd K, Dayan P. 2018 Interrupting behaviour: Minimizing decision costs via temporal  
468 commitment and low-level interrupts. *PLOS Comput. Biol.* **14**, e1005916.  
469 (doi:10.1371/journal.pcbi.1005916)
- 470 24. Risko EF, Gilbert SJ. 2016 Cognitive offloading. *Trends Cogn. Sci.* **20**, 676–688.  
471 (doi:10.1016/j.tics.2016.07.002)
- 472 25. Nowak M, Sigmund K. 1993 A strategy of win-stay, lose-shift that outperforms tit-for-tat in  
473 the Prisoner’s Dilemma game. *Nature* **364**, 56–58. (doi:10.1038/364056a0)
- 474 26. Dittmar L, Stürzl W, Baird E, Boeddeker N, Egelhaaf M. 2010 Goal seeking in honeybees:  
475 matching of optic flow snapshots? *J. Exp. Biol.* **213**, 2913–2923. (doi:10.1242/jeb.043737)
- 476 27. Chittka L, Gumbert A, Kunze J. 1997 Foraging dynamics of bumble bees: correlates of  
477 movements within and between plant species. *Behav. Ecol.* **8**, 239–249.
- 478 28. Raine NE, Chittka L. 2007 Flower constancy and memory dynamics in bumblebees  
479 (Hymenoptera: Apidae: Bombus). *Entomol. Gen.* **29**, 179.
- 480 29. Greggers U, Menzel R. 1993 Memory dynamics and foraging strategies of honeybees. *Behav.*  
481 *Ecol. Sociobiol.* **32**, 17–29. (doi:10.1007/BF00172219)
- 482 30. Real L. 2012 *Pollination Biology*. Elsevier.
- 483 31. MENZEL R. 2001 Behavioral and neural mechanisms of learning and memory as  
484 determinants of flower constancy. *Cogn. Ecol. Pollinat. Anim. Behav. Flor. Evol.* , 21–40.
- 485 32. Zentall TR, Wasserman EA, Lazareva OF, Thompson RKR, Rattermann MJ. 2008 Concept  
486 Learning in Animals. *Comp. Cogn. Behav. Rev.* **3**. (doi:10.3819/ccbr.2008.30002)

## Switching strategy in bumblebees

- 487 33. Miller EK, Nieder A, Freedman DJ, Wallis JD. 2003 Neural correlates of categories and  
488 concepts. *Curr. Opin. Neurobiol.* **13**, 198–203.
- 489 34. Wallis JD, Anderson KC, Miller EK. 2001 Single neurons in prefrontal cortex encode abstract  
490 rules. *Nature* **411**, 953–956. (doi:10.1038/35082081)
- 491 35. Chittka L, Niven J. 2009 Are bigger brains better? *Curr. Biol. CB* **19**, R995–R1008.  
492 (doi:10.1016/j.cub.2009.08.023)
- 493 36. Menzel R. 2012 The honeybee as a model for understanding the basis of cognition. *Nat. Rev.*  
494 *Neurosci.* **13**, 758–768. (doi:10.1038/nrn3357)
- 495 37. Devaud J-M, Papouin T, Carcaud J, Sandoz J-C, Grünewald B, Giurfa M. 2015 Neural  
496 substrate for higher-order learning in an insect: Mushroom bodies are necessary for configural  
497 discriminations. *Proc. Natl. Acad. Sci.* **112**, E5854–E5862. (doi:10.1073/pnas.1508422112)
- 498 38. MaBouDi H, Shimazaki H, Giurfa M, Chittka L. 2017 Olfactory learning without the  
499 mushroom bodies: Spiking neural network models of the honeybee lateral antennal lobe tract  
500 reveal its capacities in odour memory tasks of varied complexities. *PLOS Comput. Biol.* **13**,  
501 e1005551. (doi:10.1371/journal.pcbi.1005551)
- 502 39. Carcaud J, Giurfa M, Sandoz JC. 2016 Parallel olfactory processing in the honey bee brain:  
503 odor learning and generalization under selective lesion of a projection neuron tract. *Front.*  
504 *Integr. Neurosci.* , 75. (doi:10.3389/fnint.2015.00075)
- 505 40. Avarguès-Weber A, Giurfa M. 2013 Conceptual learning by miniature brains. *Proc. R. Soc.*  
506 *Lond. B Biol. Sci.* **280**, 20131907. (doi:10.1098/rspb.2013.1907)
- 507 41. Carere C, Locurto C. 2011 Interaction between animal personality and animal cognition. *Curr.*  
508 *Zool.* **57**, 491–498. (doi:10.1093/czoolo/57.4.491)
- 509 42. Muller H, Grossmann H, Chittka L. 2010 ‘Personality’ in bumblebees: individual consistency  
510 in responses to novel colours? *Anim. Behav.* **80**, 1065–1074.  
511 (doi:10.1016/j.anbehav.2010.09.016)

512

## Switching strategy in bumblebees

513

## 514 **Figures**

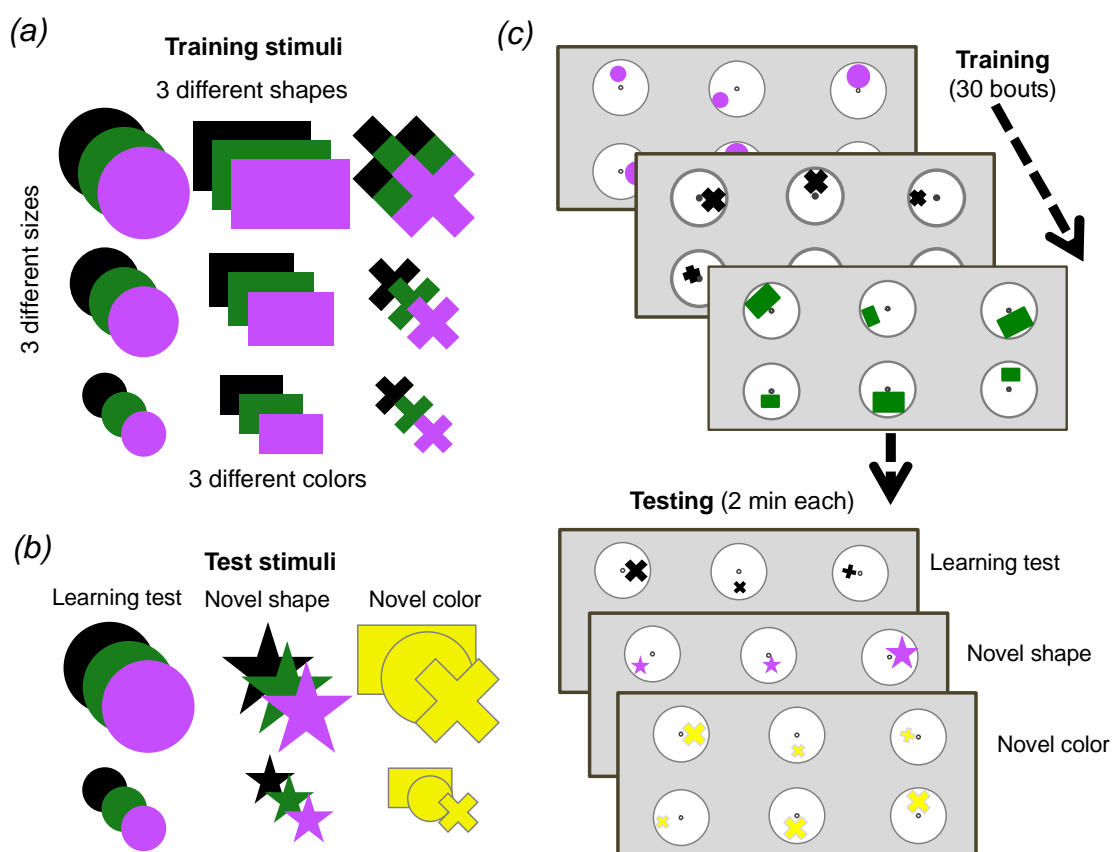

515

516 **Figure 1. Training and testing protocol.** (a) Stimuli options used during training. (b) Stimuli  
517 options used for each of the three different unrewarded tests. (c) Training and test protocol. Bees  
518 were trained for 30 bouts (visits to the arena before returning to the hive). All stimuli in (a) were  
519 used randomly across bouts during training. Only two of the possible three sizes of shapes were  
520 presented during a single bout. Only one of the possible three colours and one of the possible  
521 three shapes were presented each bout. One group of bees ( $n = 10$ ) was trained to find 50%  
522 sucrose solution at the centre of the stimulus containing the bigger of the three shapes and bitter  
523 quinine solution at the smaller of the three shapes. Another group ( $n = 8$ ) were trained on the  
524 opposite contingency. Once training was complete, bees were subjected to three unrewarded  
525 tests (with one or two reminder/training bouts between each test to keep bees motivated). All  
526 tests used small and large sized shapes. The learning test used one randomly chosen type and  
527 colour used during training. The novel shape test used one randomly chosen colour used during  
528 training but always a star shape that had not been used during training. The novel colour test  
529 used one randomly chosen shape used during training but always coloured yellow, which had not  
530 been used during training.



## Switching strategy in bumblebees

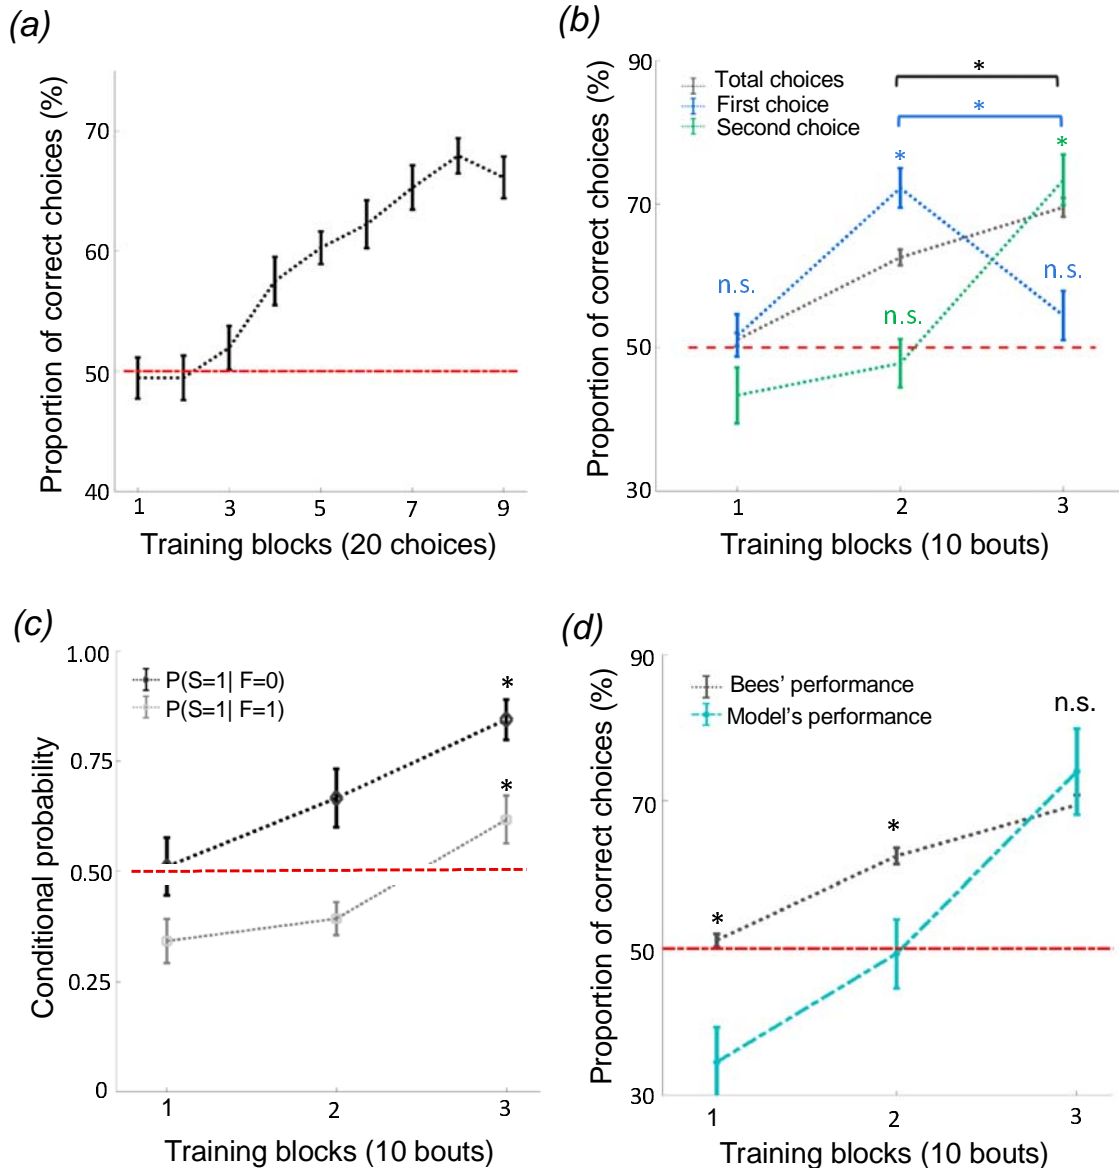

531

532 **Figure 2. Bees use a win-stay/lose-switch strategy after extensive training.**

533 (a) There was a significant increase in the number of correct choices over the 180 conditioned  
 534 choices ( $p = 0.018$ ). (b) Bees' performance over 3 blocks of 10 training bouts during the relative  
 535 size discrimination task. Performance increased gradually over bouts when considering total  
 536 number of choices in each bout (black line;  $p = 1.96e-4$ ). Bees' first choice performance  
 537 increased significantly from the first to the second block of training bouts to 72.22% ( $p = 3.71e-4$ )  
 538 but then dropped to chance level from the second to third block of training bouts (blue line;  $p =$   
 539 0.79). Second choice performance was near chance for the first two blocks of training bouts ( $p >$   
 540 0.49), but then increased significantly during the third block of training bouts (green line;  $p =$   
 541 4.28e-4). These results indicate that bees changed to a win-stay/lose-switch strategy after  
 542 extensive training. Vertical lines = standard error of the mean. Red dashed line = chance level

## Switching strategy in bumblebees

543 performance (50%). (c) The average conditional probabilities of a bee's second choice within  
544 each bout being correct given the outcome of the bee's first choice of the bout (either correct or  
545 incorrect). Both conditional probabilities increased to above chance during the second and third  
546 blocks of bouts ( $p = 0.02$  for win-stay and  $p = 2.75e-4$  for lose-switch) (d) Our win-stay/lose-  
547 switch model's performance matches our bees' performance on the task during the last block of  
548 10 bouts during training ( $p=0.15$ ), again suggesting that after extensive training bees changed to  
549 a win-stay/lose-switch strategy. (Vertical lines = standard error of the mean). Red dashed line =  
550 chance level (50%).

551

552

553

554

555

556

### Switching strategy in bumblebees

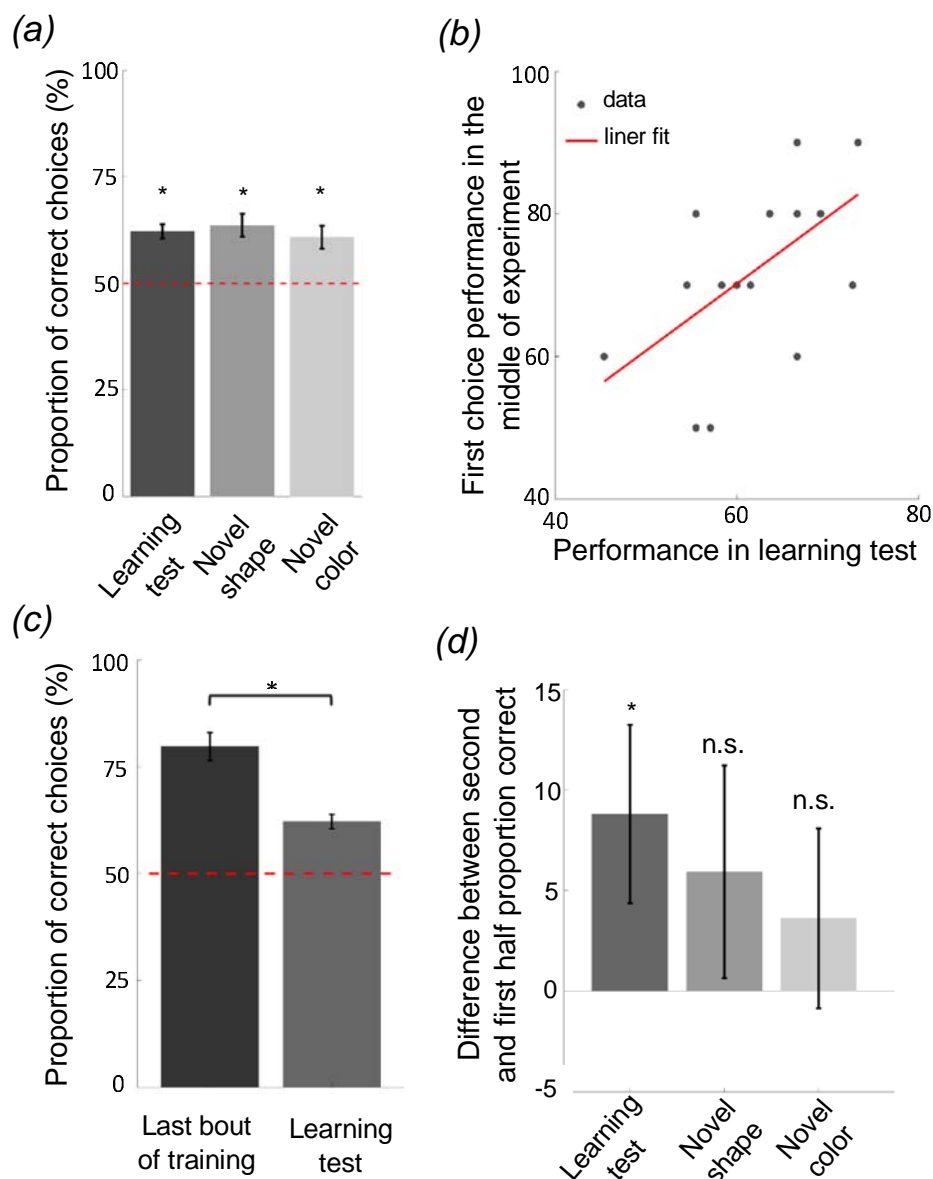

557

558 **Figure 3. Bees learn and retain a relative size rule.** (a) The performance of bees during each  
 559 of the three unrewarded tests shows that they learned and retained the concept of relative size (p  
 560 <2.41e-3). (b) The scatter plot displays the correlation between the performance of bees in the  
 561 learning test and their first choice performance prior to changing strategies, during the second  
 562 block of 10 bouts (rho = 0.58, p = 0.01). The red solid line = line of best fit. (c and d) The  
 563 significant drop in performance from the last bout of training to the learning test (p=9.30e-4) (d)  
 564 and the difference in performance between the second and first half of choices during each of the  
 565 tests (p = 0.03 for learning test; p = 0.28 for novel shape transfer test; p = 0.14 for novel colour  
 566 transfer test) suggest that bees had begun the tests with the win-stay/lose-switch strategy. Bars =  
 567 mean. Vertical lines = standard error of the mean. Red dashed line = chance level (50%).  
 568

## Switching strategy in bumblebees

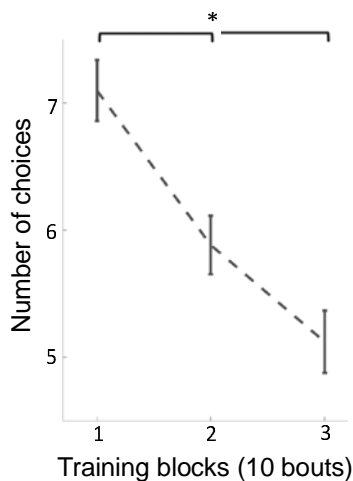

569

570 **Figure 4. The average of number of choices on stimuli (correct and incorrect) over 3**  
571 **blocks of 10 training bouts.** Over training bouts, bees made fewer choices to visit all three  
572 available rewarding stimuli ( $p = 1.17e-5$ ), indicating that bees continually increased efficiency on  
573 solving the task during training. Vertical lines = standard error of the mean.

574

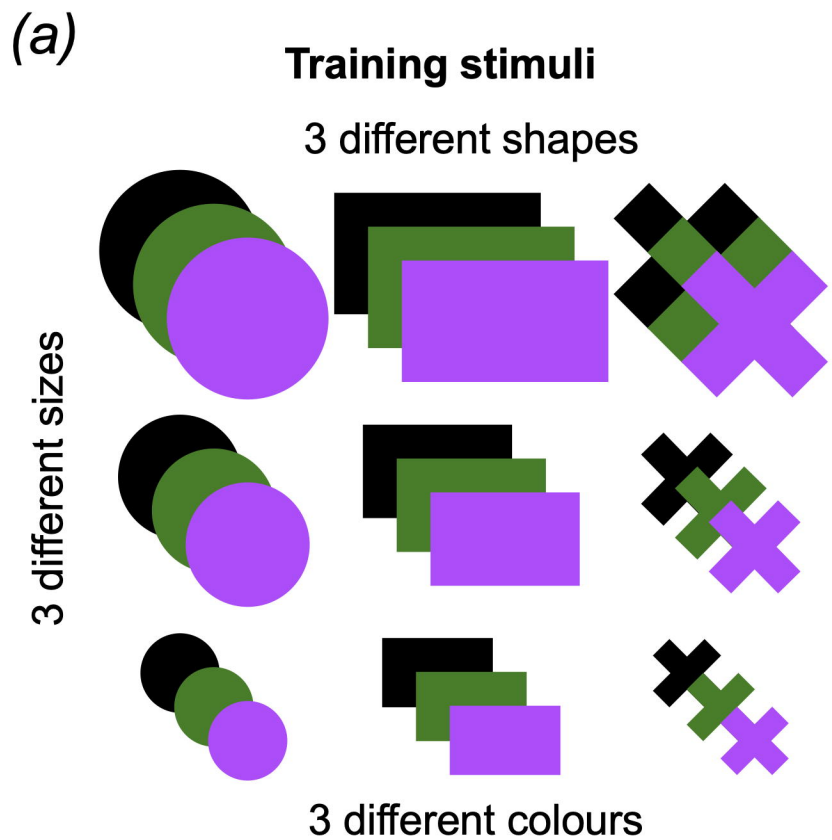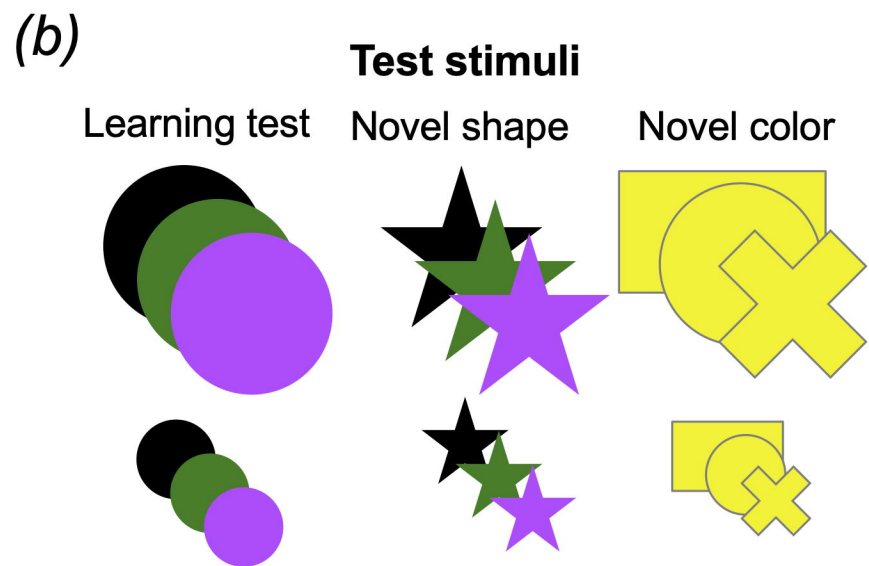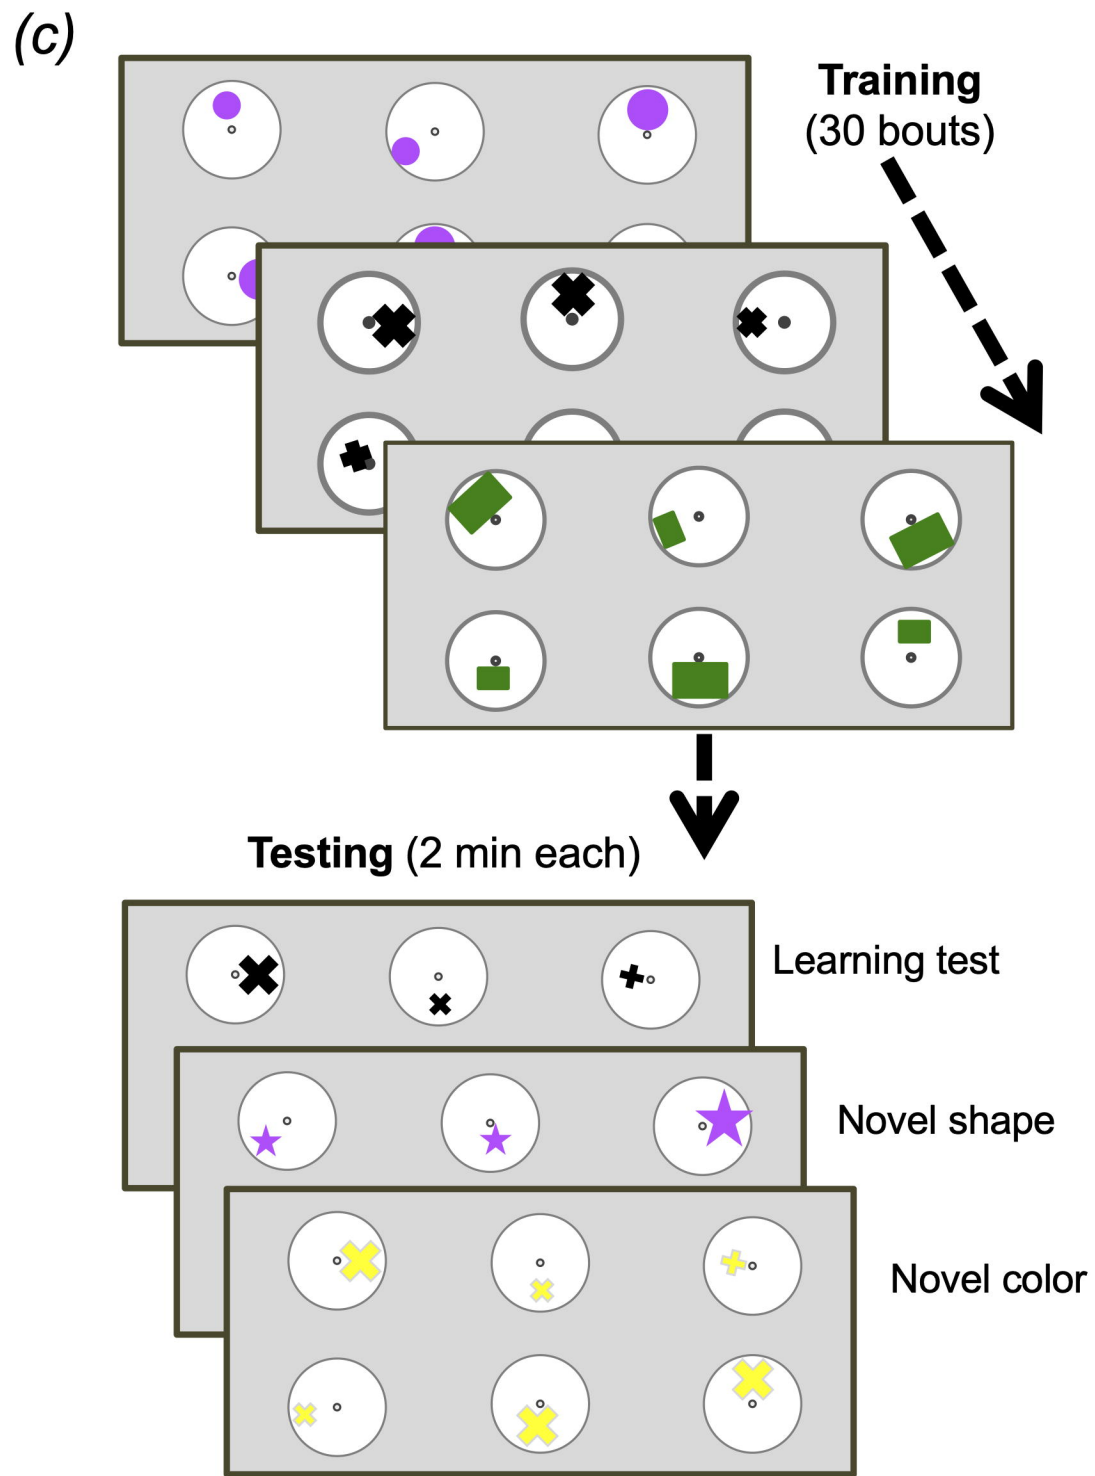

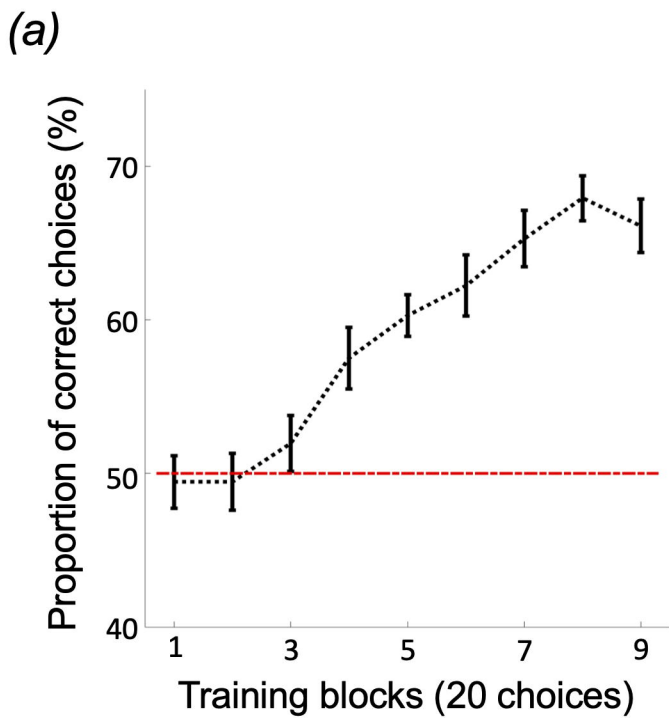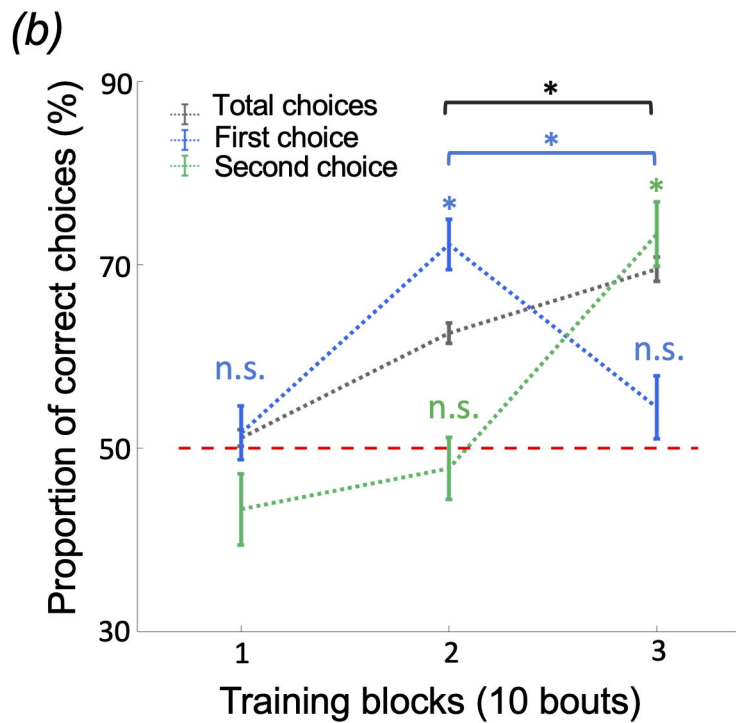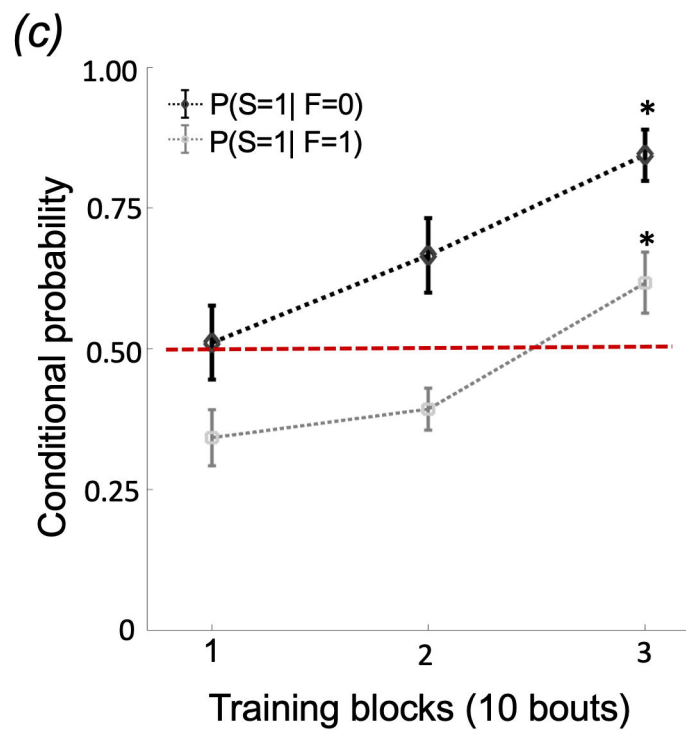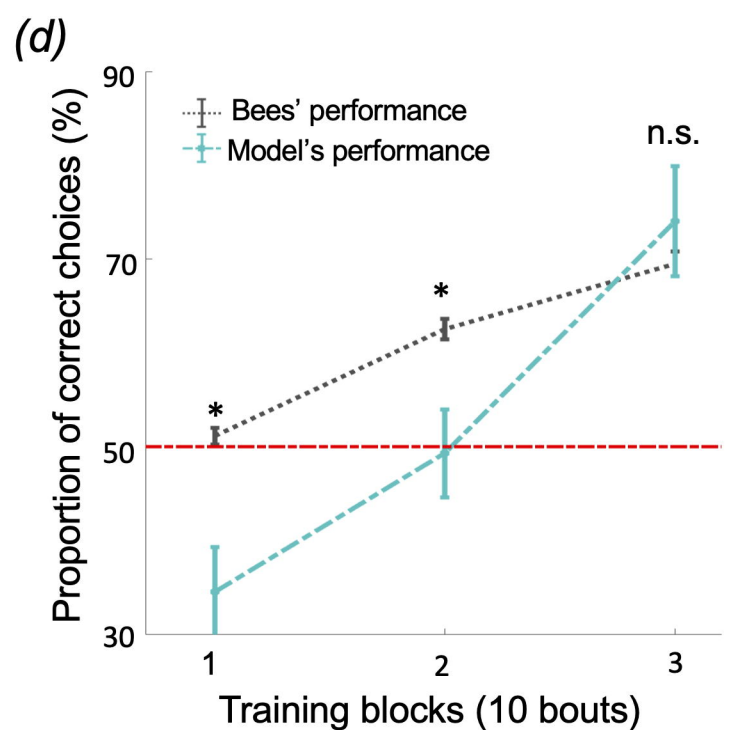

(a)

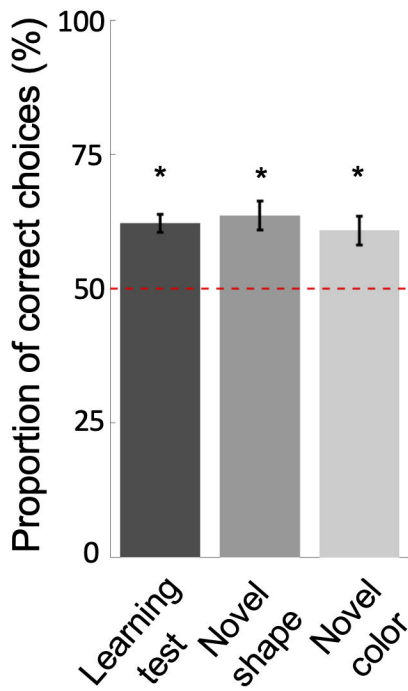

(b)

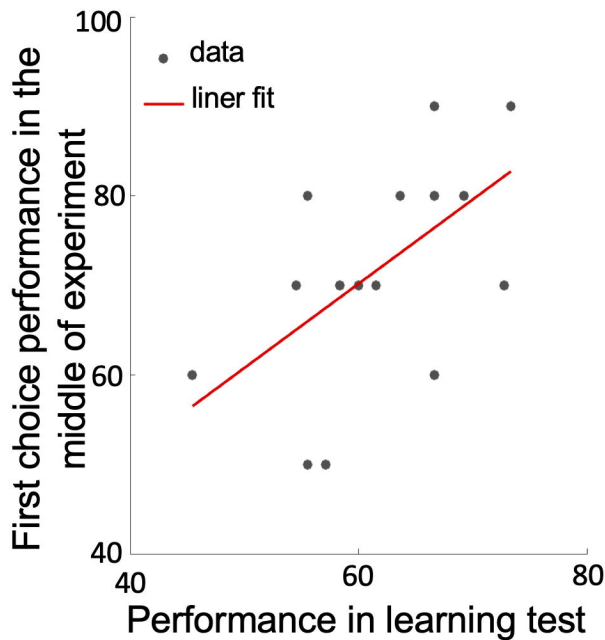

(c)

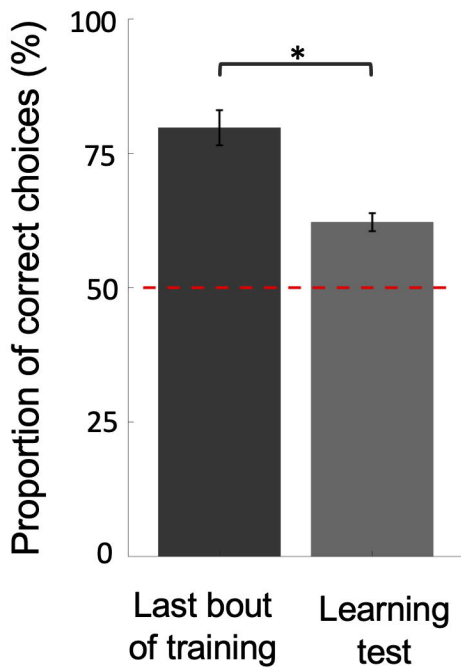

(d)

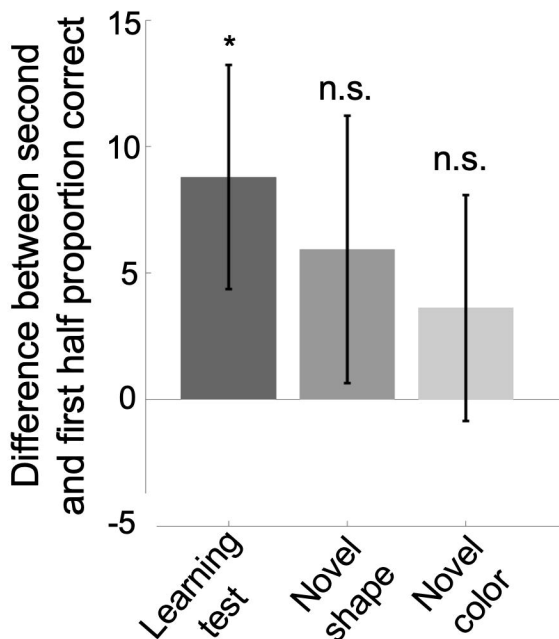

Number of choices

7

6

5

1

2

3

Training blocks (10 bouts)

\*

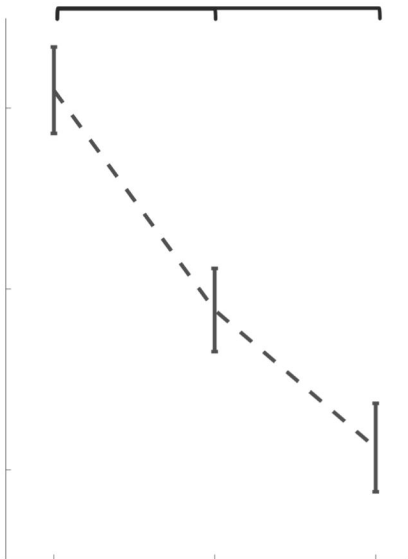

Source: https://www.biorxiv.org/content/10.1101/2020.05.08.085142v1.full.pdf
